# Supplementary material for: Facilitated transport and diffusion take distinct spatial routes through the nuclear pore complex
Source: Oxford University Press journal article supplement (doi:10.1242/jcs.070730), 2010-07-21
Supplement: jcs070730tables1.pdf [file jcs070730tables1.pdf]

**Supplementary material Table S1. Vectors used in this study**

| <b>Vector name</b>            | <b>Vector backbone</b> | <b>Gene cloned</b>   | <b>Description</b>                                       | <b>Source</b>             |
|-------------------------------|------------------------|----------------------|----------------------------------------------------------|---------------------------|
| pSpo12 <sub>76-130</sub> -GFP | pYX242-GFP             | <i>SPO12</i> NLS-GFP | <i>SPO12</i> NLS fused to GFP under TPI promoter         | (Chaves and Blobel, 2001) |
| pNS167                        | pGFP-N-fus             | <i>NAB2</i> NLS-GFP  | <i>NAB2</i> NLS fused to GFP under <i>MET25</i> promoter | (Shulga et al., 2000)     |
| GFP-pESC-URA                  | pESC-URA               | GFP                  | GFP under ADH1 promoter                                  | This study                |
