# Supplementary material for: Facilitated transport and diffusion take distinct spatial routes through the nuclear pore complex
Source: Oxford University Press journal article supplement (doi:10.1242/jcs.070730), 2010-07-21
Supplement: jcs070730tables2.pdf [file jcs070730tables2.pdf]

Supplementary material Table S2.

Summary of all log-likelihood ratio tests for various cargos.

| Cargo   | NH                   | $G$  | df | $P$     |
|---------|----------------------|------|----|---------|
| Kap104  | $f = \text{uniform}$ | 15.6 | 2  | < 0.001 |
| Kap121  | $f = \text{uniform}$ | 50.4 | 2  | < 0.001 |
| Gle1    | $f = \text{uniform}$ | 32.0 | 2  | < 0.001 |
| Dbp5    | $f = \text{uniform}$ | 26.0 | 2  | < 0.001 |
| GFP     | $f = \text{uniform}$ | 0.26 | 2  | 0.88    |
| Kap104  | $f_M = f_W$          | 0.89 | 2  | 0.64    |
| Kap121  | $f_M = f_W$          | 30.2 | 2  | < 0.001 |
| Kap121* | $f = \text{uniform}$ | 0.76 | 2  | 0.68    |

Two types of test are presented that are distinguished by the null hypothesis (NH).  $f = \text{uniform}$  indicates the NH “gold particles are uniformly distributed within the NPC”, whereas  $f_M = f_W$  indicates the NH “the distribution of gold particles within the NPC is the same for both the wild type and mutant strains”.  $G$  is the test statistic, df is the associated degrees of freedom and  $P$  is the level of statistical significance. The asterisk indicates that the data are from the mutant strain.
